# Supplementary material for: Design of charge transfer channels: defective TiO2/MoP supported on carbon cloth for solar-light-driven hydrogen generation
Source: Royal Society of Chemistry journal article supplement (doi:10.1039/d0qi01527j), 2021-01-01
Supplement: d0qi01527j1.pdf [file d0qi01527j1.pdf]

## Supporting Information

### Design of Charge Transfer Channels: Defective TiO<sub>2</sub>/MoP Supported on Carbon Cloth for Solar-Light-Driven Hydrogen Generation

Qianqian Tian,<sup>a</sup> Shasha Yi,<sup>b</sup> Chuanqi Li,<sup>a</sup> Yan Liu,<sup>a</sup> Zhulin Niu,<sup>a</sup> Xinzheng Yue<sup>\*a</sup> and Zhongyi Liu<sup>\*a</sup>

<sup>a</sup>College of Chemistry, Zhengzhou University, Zhengzhou 450001, China.

<sup>b</sup>School of Materials Science and Engineering, Zhengzhou University, Zhengzhou 450001, China.

\*Corresponding authors

E-mail addresses: yuexz@zzu.edu.cn (Xinzheng Yue), lzy2020lsch@outlook.com (Zhongyi Liu)

## Table of contents

|                                              |     |
|----------------------------------------------|-----|
| 1. Experimental section .....                | S3  |
| 1.1 Materials.....                           | S3  |
| 1.2 Characterization .....                   | S3  |
| 1.3 (Photo)electrochemical measurements..... | S5  |
| 2. Supplementary Figures .....               | S6  |
| Figure S1.....                               | S6  |
| Figure S2.....                               | S7  |
| Figure S3.....                               | S8  |
| Figure S4.....                               | S9  |
| Figure S5.....                               | S10 |
| Figure S6.....                               | S11 |
| Figure S7.....                               | S12 |
| Figure S8.....                               | S13 |
| Figure S9.....                               | S14 |
| Figure S10.....                              | S15 |
| Figure S11.....                              | S16 |
| Figure S12.....                              | S17 |
| Figure S13.....                              | S18 |
| 3. Supplementary Tables .....                | S19 |
| Table S1 .....                               | S19 |
| Table S2 .....                               | S20 |
| 4. Supplemental references .....             | S21 |

## 1. Experimental section

### 1.1 Materials

Ammonium molybdate ( $(\text{NH}_4)_6\text{Mo}_7\text{O}_{24}\cdot 4\text{H}_2\text{O}$ ,  $\geq 99\%$ ), ammonium phosphate ( $(\text{NH}_4)_2\text{HPO}_4$ ,  $\geq 99\%$ ), acetone ( $\text{C}_3\text{H}_6\text{O}$ ,  $\geq 99.5\%$ ), barium sulfate ( $\text{BaSO}_4$ , 99%) and nitric acid ( $\text{HNO}_3$ ,  $\geq 68\%$ ) were purchased from Tianjin Kermel Chemical Reagent Co., Ltd. Acetic acid ( $\text{CH}_3\text{COOH}$ ,  $\geq 90\%$ ), citric acid ( $\text{C}_6\text{H}_8\text{O}_7$ ,  $\geq 99.5\%$ ) and iodine ( $\text{I}_2$ ,  $\geq 99.8\%$ ) were bought from Tianjin Fengchuan Chemical Reagent Co., Ltd. Potassium hydroxide ( $\text{KOH}$ ,  $\geq 85\%$ ), ethanol ( $\text{CH}_3\text{CH}_2\text{OH}$ ,  $\geq 95.0\%$ ), tetrabutyl titanate (TBOT,  $\geq 98.0\%$ ) and triethanolamine (78%) were purchased from Shanghai Chemical Reagent Co., Ltd. The deionized water with a resistivity of  $18.2 \text{ M}\Omega\cdot\text{cm}$  was obtained by reverse osmosis followed by ion-exchange and filtration. Carbon cloth (CC, WOS1009) was commercially available from Nantong Co., Ltd. Before experiment, the CC ( $1 \text{ cm} \times 1.5 \text{ cm}$ ) was treated with  $0.5 \text{ M HNO}_3$ , after which it was ultrasonically rinsed in water and ethanol for several times until its pH value adjusted to 7 and then dried by Ar stream. All chemicals used in this study are of analytical grade without further purification. The  $\text{N}_2/\text{H}_2$  gas mixture (10 vol% of  $\text{H}_2$ ),  $\text{N}_2$  and Ar (99.999%) were provided by Henan Yuanzheng Technology Development Co., Ltd.

### 1.2 Characterization

The crystal phase compositions of the as-prepared samples were examined with X-ray diffraction (XRD) with a Bruker XRD-D8 Advance diffractometer at 40 kV and 40 mA, in which  $\text{Cu K}\alpha$  was used as radiation ( $\lambda = 1.54056 \text{ \AA}$ ). X-ray photoelectron spectroscopy (XPS) was conducted on a Thermo VG Scientific ESCALAB 250 with  $\text{Al K}\alpha$  X-ray source. All binding energies were calibrated to adventitious carbon peak value of 284.8 eV. The field-emission scanning electron microscope (FESEM) and energy-dispersive X-ray (EDX) elemental mapping were obtained by JEOL JSM 6700F

electron microscope. Transmission electron microscopy (TEM) and selected area electron diffraction (SAED) were operated on a Tecnai G2 F20 TEM microscope (FEI Company). The Brunauer-Emmett-Teller (BET) measurements were analyzed on JW BK112 specific surface area pore size analyzer (JWGB SCI&TECH). The ultraviolet-visible diffuse reflectance spectra (UV-vis DRS) were recorded using Shimadzu UV-3600 spectrophotometer equipped with an integrating sphere in the wavelength range of 300-800 nm. Raman spectra were carried out by a laser Raman spectrometer (LabRAM HR Evo) at an excitation wavelength of 532 nm in Raman shift range of 100-2000  $\text{cm}^{-1}$ . The electron paramagnetic resonance (EPR) spectra were collected via a BRUCER EMXplus-9.5/12 spectrometer at 9.44 GHz at 298 K. The photoluminescence (PL) emission spectra were performed on a fluorescence spectrophotometer (HITACHI F-4600) with an excitation wavelength of 325 nm. Time-resolved photoluminescence (TRPL) spectra were obtained via a transient fluorescence spectrometer (FLS980), whose excitation wavelength is 530 nm. Surface photovoltage (SPV) measurements contain a 500 W Xe lamp (CHF-XM-500 W, Global Xenon Lamp Power) equipped with a grating monochromator as light source, a computer, a lock-in amplifier (SR830-D SP) with a light chopper (SR540) and a photovoltaic cell with fluorine-doped tin oxide (FTO) electrode-mica-sample-FTO structure. Before SPV test, the system was calibrated by a DSI200 UV enhanced silicon detector to eliminate the possible phase shift not correlated to the SPV response. The phase retardation can reflect the kinetics of SPV response. Transient photovoltage (TPV) signals were recorded on digital phosphor oscilloscope (TDS 5054, Tektronix) with an excitation wavelength of 355 nm. The intensity of the pulse was controlled with a neutral grey filter and determined with a Joule meter (Starlite, Ophir, Inc.).

### 1.3 (Photo)electrochemical measurements

Typically, the electrochemical and photoelectrochemical (PEC) measurements were carried out on an electrochemical analyzer (RST electrochemical workstation) using a three-electrode system, where the as-prepared CC-based photocatalyst, Pt wire and Ag/AgCl (saturated KCl) were served as the working electrode, counter electrode and reference electrode, respectively. For electrochemical and PEC measurements, 1 M KOH aqueous solution (pH 13.6) was used as the electrolyte. Linear sweep voltammetric (LSV) curves were recorded in the potential range of  $-0.8$  to  $-1.6$  V *vs.* Ag/AgCl in dark condition with the scan rate of  $50$  mV s<sup>-1</sup>. For PEC test, a 300 W Xe lamp (CEL-HXF300, Beijing China Education Au-light Co., Ltd) equipped with an AM 1.5G optical filter to simulate solar light. Electrochemical impedance spectroscopy (EIS) was conducted under light irradiation with an amplitude of 5 mV over the frequency range from 100 kHz to 0.1 Hz at potential of 0 V *vs.* Ag/AgCl. Mott-Schottky (M-S) plots were recorded over an AC frequency of 1000 Hz in dark condition to obtain the types of semiconductors and flat band potentials. Current-time (*i-t*) curves were conducted at 0 V *vs.* Ag/AgCl by switching on/off light for every 30 s.

## 2. Supplementary Figures

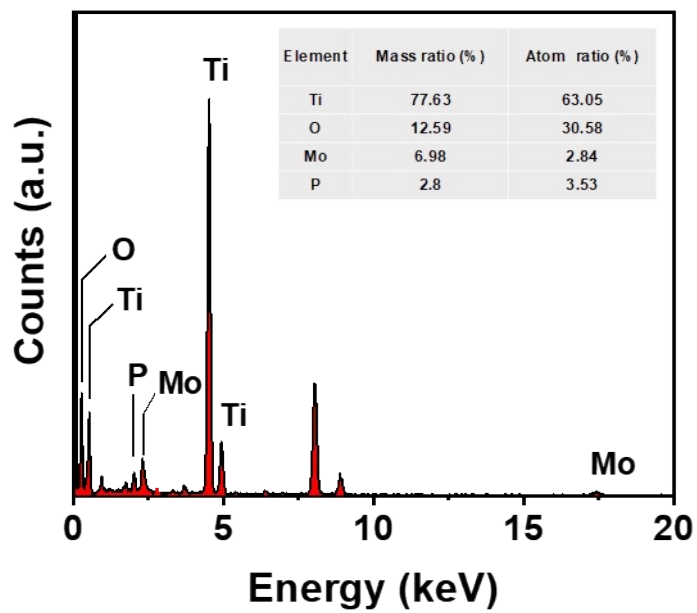

Fig. S1 EDX spectrum of  $\text{TiO}_2/\text{MoP}/\text{CC}$  specimen. Inset summarizes the element contents of Ti, O, Mo and P.

In Fig. S1, it is evident that Mo, P, Ti and O elements exist in  $\text{TiO}_2/\text{MoP}/\text{CC}$

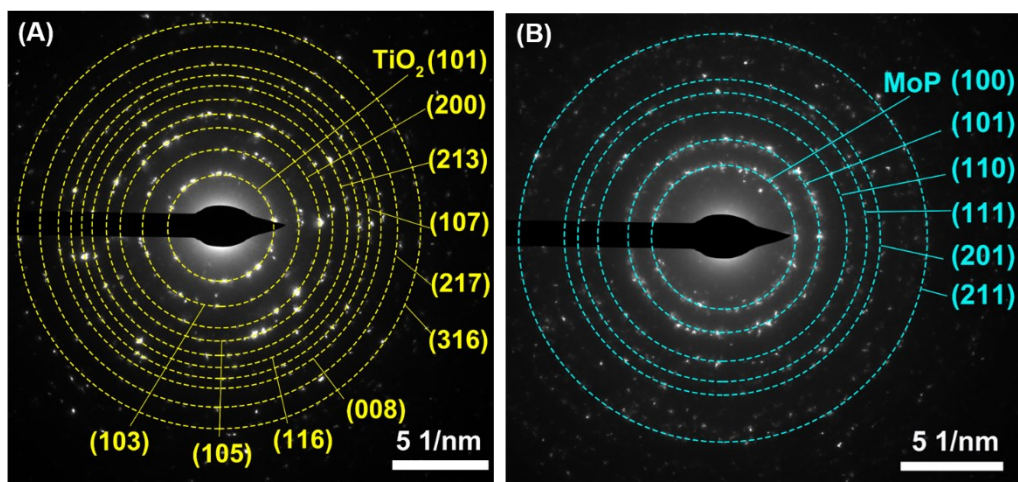

**Fig. S2** SAED patterns of (A) TiO<sub>2</sub>/CC and (B) MoP/CC samples.

In Fig. S2, diffraction rings of TiO<sub>2</sub> and MoP can be clearly observed in TiO<sub>2</sub>/CC and MoP/CC samples, respectively. These results reveal the good crystallinity characteristic of both TiO<sub>2</sub> and MoP.

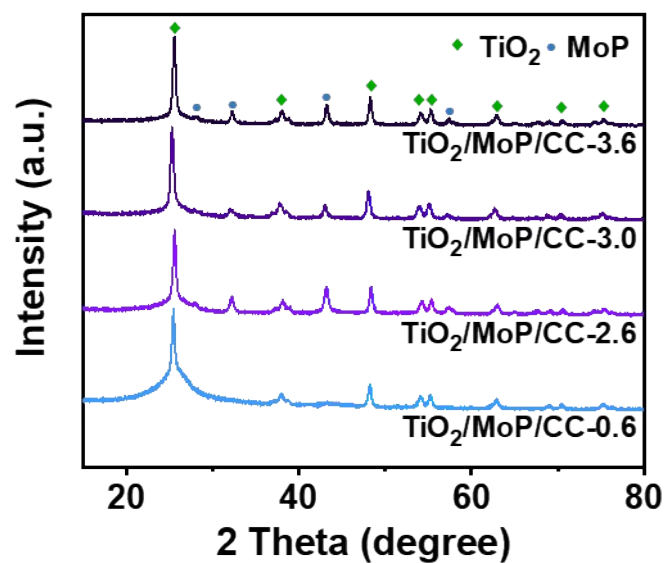

**Fig. S3** XRD patterns of TiO<sub>2</sub>/MoP/CC-*x* (*x* = 0.6, 2.6, 3.0 and 3.6) samples.

Fig. S3 shows the XRD patterns of TiO<sub>2</sub>/MoP/CC-*x* (*x* = 0.6, 2.6, 3.0 and 3.6) samples. No XRD peaks of MoP can be detected in TiO<sub>2</sub>/MoP/CC-0.6, attributing to its low content. As the value of *x* increases, the signal intensity of MoP in hybrid catalysts enhance gradually.



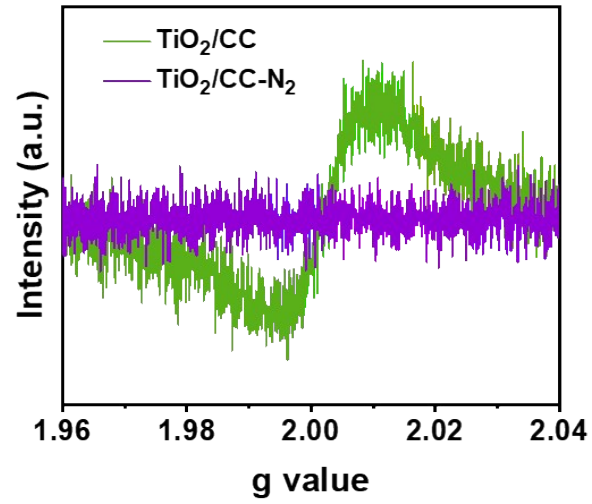

**Fig. S4** Electron paramagnetic resonance (EPR) spectra of TiO<sub>2</sub>/CC and TiO<sub>2</sub>/CC-N<sub>2</sub>.

Fig. S4 shows the EPR spectra of TiO<sub>2</sub>/CC and TiO<sub>2</sub>/CC-N<sub>2</sub> samples. It can be clearly seen that no EPR signal is detected in TiO<sub>2</sub>/CC-N<sub>2</sub>.

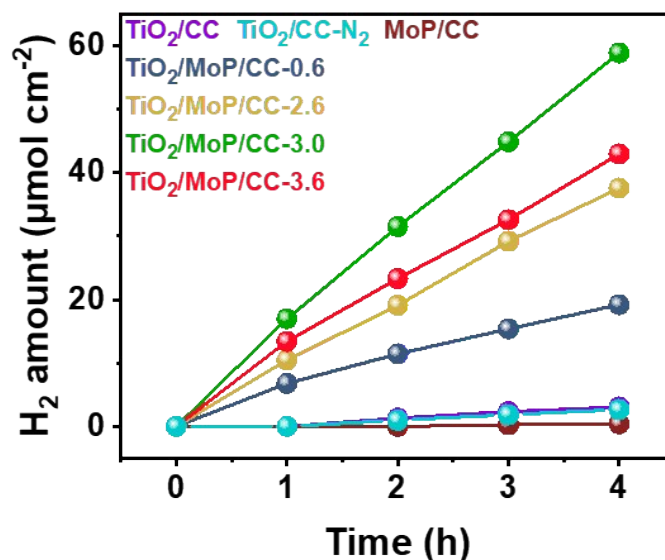

**Fig. S5** Photocatalytic H<sub>2</sub> evolution performances of TiO<sub>2</sub>/CC, TiO<sub>2</sub>/CC-N<sub>2</sub>, MoP/CC and TiO<sub>2</sub>/MoP/CC-*x* (*x* = 0.6, 2.6, 3.0 and 3.6) samples.

Fig. S5 shows the photocatalytic activities of the as-prepared samples under simulated light irradiation. Almost no H<sub>2</sub> is generated on MoP/CC. The H<sub>2</sub> evolution amount of TiO<sub>2</sub>/CC is slightly larger than that of TiO<sub>2</sub>/CC-N<sub>2</sub>. Nevertheless, the composite of TiO<sub>2</sub>/MoP/CC-*x* (*x* = 0.6, 2.6, 3.0 and 3.6) display significantly enhanced photocatalytic activity compared with TiO<sub>2</sub>/CC and MoP/CC.

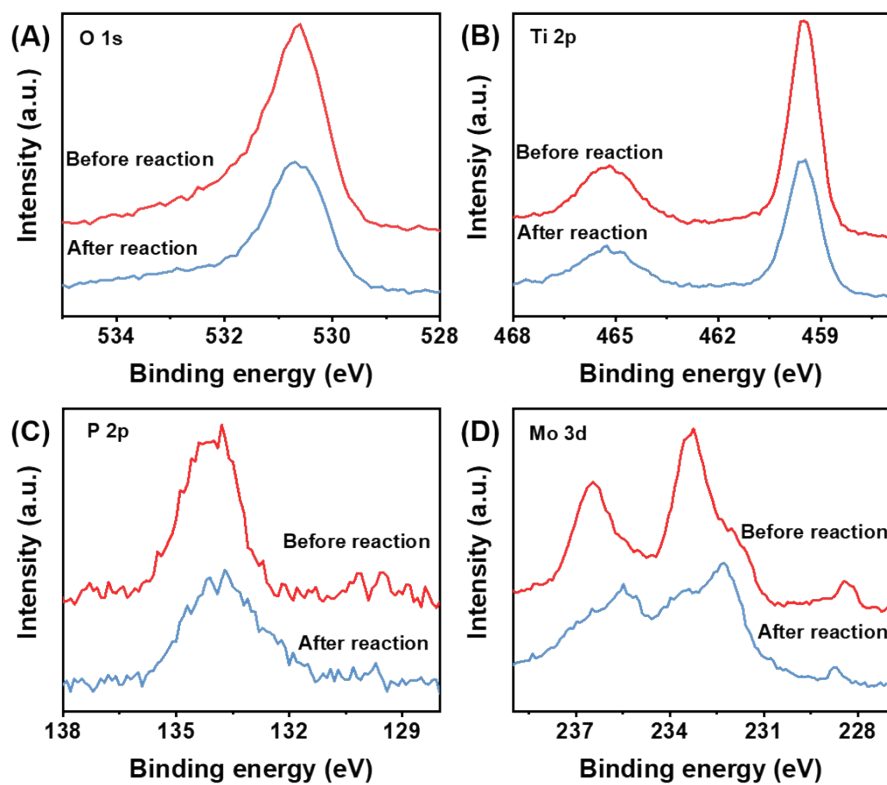

**Fig. S6** XPS spectra of (A) O 1s, (B) Ti 2p, (C) P 2p and (D) Mo 3d for TiO<sub>2</sub>/MoP/CC sample before and after long-term photocatalytic tests.

In Fig. S6, no obvious change of the high-resolution O 1s, Ti 2p, P 2p and Mo 3d XPS spectra of TiO<sub>2</sub>/MoP/CC sample is found before and after long-term photocatalytic tests.

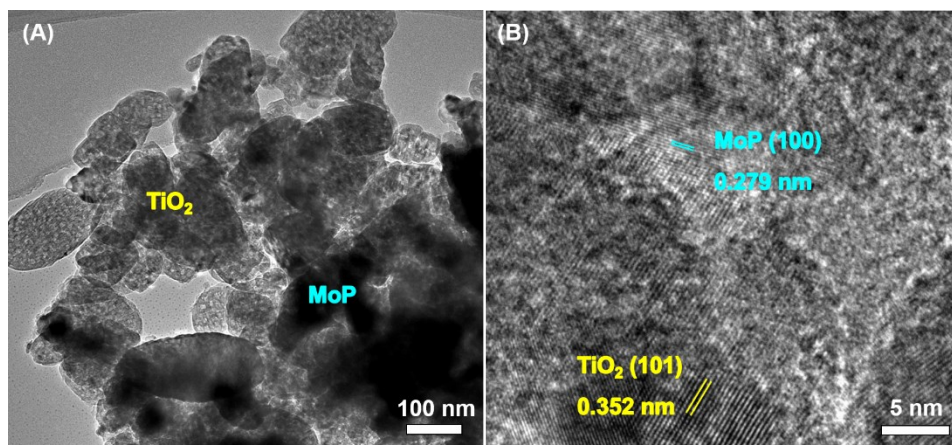

**Fig. S7** (A) TEM and (B) HRTEM images of TiO<sub>2</sub>/MoP/CC sample after long-term photocatalytic H<sub>2</sub> evolution tests.

It is clear that both TiO<sub>2</sub> and MoP can be seen in TiO<sub>2</sub>/MoP/CC sample, elucidating that the continuous recycling tests can not destroy the heterojunction structure of TiO<sub>2</sub>/MoP, suggesting its high stability.

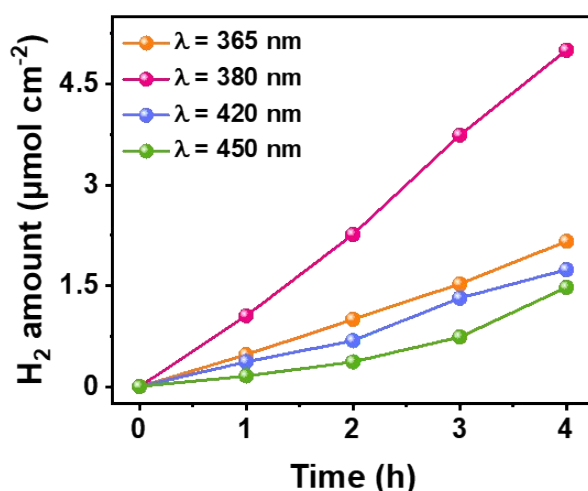

Fig. S8 Time course of H<sub>2</sub> generation of TiO<sub>2</sub>/MoP/CC under illumination of 365, 380, 420 and 450 nm in 10 vol% of triethanolamine aqueous solution.

Fig. S8 shows the H<sub>2</sub> generation amount as a function of time over TiO<sub>2</sub>/MoP/CC under illumination of different incident wavelengths. The apparent quantum yield (AQY) can be calculated according to the following Eq. S1:

$$AQY(\%) = \frac{2 \times \text{Number of evolved } H_2 \text{ molecules}}{\text{Number of incident photons}} \times 100\% = \frac{2N_1}{N_2} \times 100\% \quad (S1)$$

where N<sub>1</sub> and N<sub>2</sub> represent the number of evolved H<sub>2</sub> molecules and incident photons, respectively.

Here, taken the incident wavelength of 365 nm as an example,  $N_1 = H_2 \text{ evolution amount} \times \text{Avogadro's Constant}$ , where the value of Avogadro's constant is

$6.022 \times 10^{23} \text{ mol}^{-1}$ .  $N_2 = \frac{E\lambda}{hc}$ , where E is the power of Xe lamp ( $2.818 \text{ W m}^{-2}$ ),  $\lambda$  is the incident wavelength ( $365 \times 10^{-9} \text{ m}$ ), h is the Planck's constant ( $6.63 \times 10^{-34} \text{ J}\cdot\text{s}$ ), c is the speed of light ( $3.0 \times 10^8 \text{ m s}^{-1}$ ), and the irradiation area is  $38.48 \text{ cm}^2$ . In addition, the reaction time is  $1.44 \times 10^4 \text{ s}$ . Then, the value of N<sub>1</sub> and N<sub>2</sub> are calculated to be  $1.30 \times 10^{18}$  and  $2.87 \times 10^{20}$ , respectively. As a result, the apparent quantum yield of TiO<sub>2</sub>/MoP/CC is 0.906% at 365 nm irradiation.

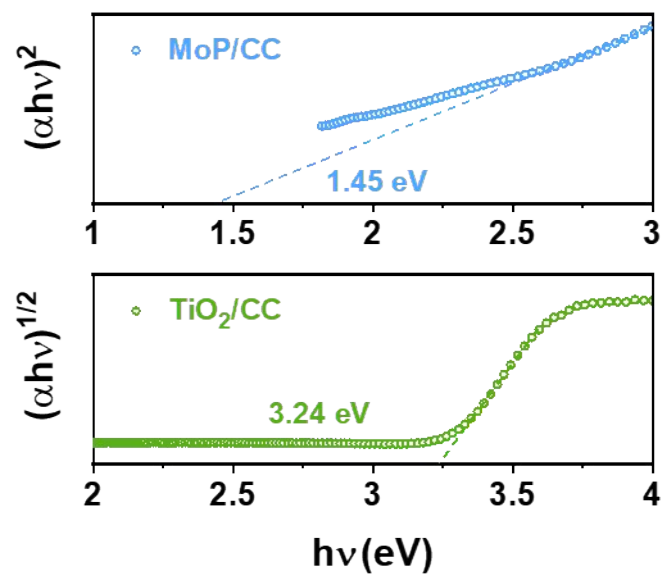

**Fig. S9.** Tauc plots of TiO<sub>2</sub>/CC and MoP/CC samples derived from their UV-vis DRS.

Fig. S9 shows the Tauc plots  $(\alpha h\nu)^n$  ( $n = 2$  and  $1/2$  for direct and indirect semiconductors, respectively) of MoP/CC and TiO<sub>2</sub>/CC as a function of photonic energy ( $h\nu$ ).

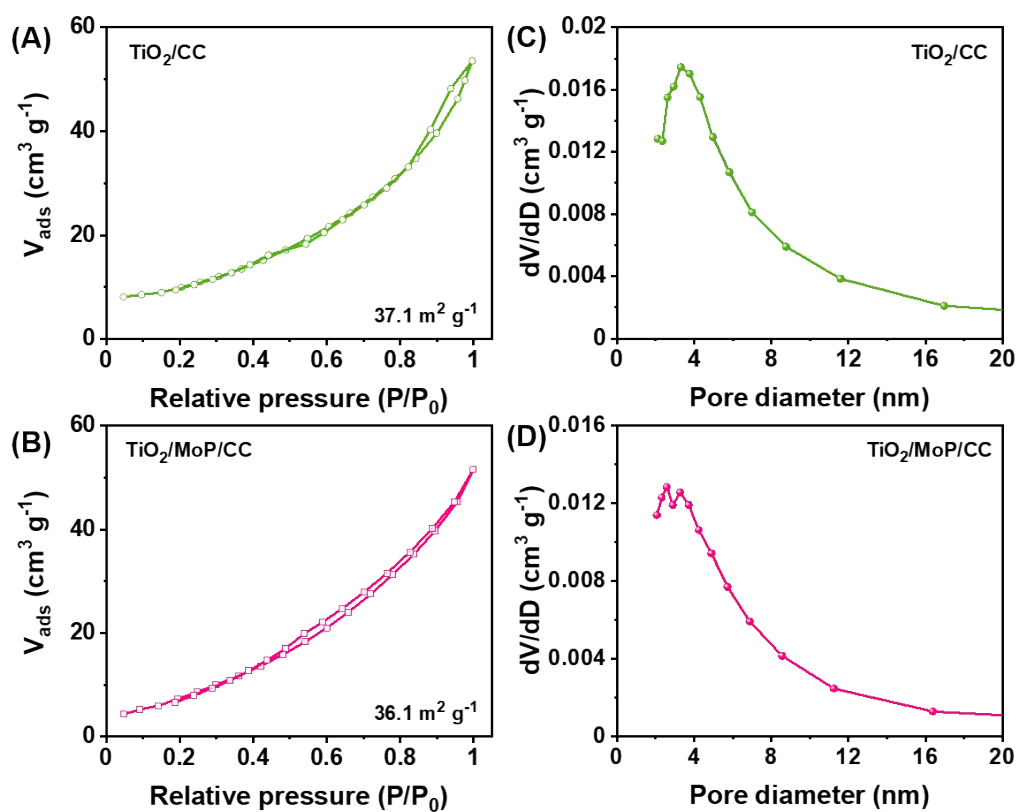

**Fig. S10** (A,B) N<sub>2</sub> adsorption-desorption isothermal curves and (C,D) BJH pore diameter distribution of TiO<sub>2</sub> and TiO<sub>2</sub>/MoP/CC, respectively.

N<sub>2</sub> adsorption-desorption isotherms were carried out to explore the Brunauer-Emmett-Teller (BET) surface area of the as-prepared photocatalysts. As shown in Fig. S10, both TiO<sub>2</sub>/CC and TiO<sub>2</sub>/MoP/CC display type IV isotherms with type H3 hysteresis loop, suggesting the presence of mesopore structure.<sup>1,2</sup>

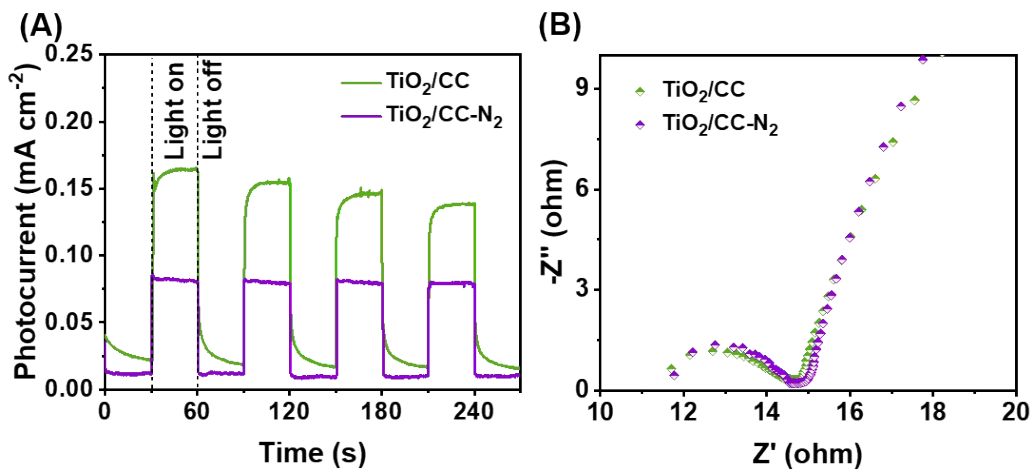

**Fig. S11** (A) Current-time responses and (B) electrochemical impedance spectroscopy Nyquist plots of TiO<sub>2</sub>/CC and TiO<sub>2</sub>/CC-N<sub>2</sub>.

It can be seen in Fig. S11 that TiO<sub>2</sub>/CC exhibits larger photocurrent and smaller charge transfer resistance than that of TiO<sub>2</sub>/CC-N<sub>2</sub>.



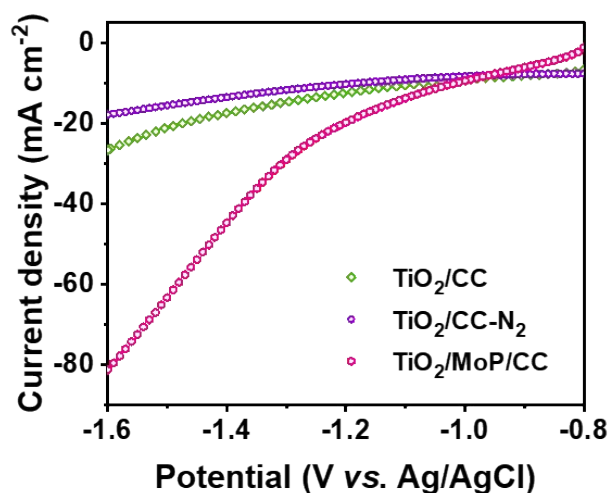

Fig. S12 Linear sweep voltammetric curves of TiO<sub>2</sub>/CC, TiO<sub>2</sub>/CC-N<sub>2</sub> and TiO<sub>2</sub>/MoP/CC obtained in 1 M KOH electrolyte in dark condition.

Fig. S12 shows the linear sweep voltammetric curves of TiO<sub>2</sub>/CC, TiO<sub>2</sub>/CC-N<sub>2</sub> and TiO<sub>2</sub>/MoP/CC in 1 M KOH solution. It can be clearly seen that TiO<sub>2</sub>/MoP/CC shows the largest cathodic current density and smallest overpotential among the three samples.

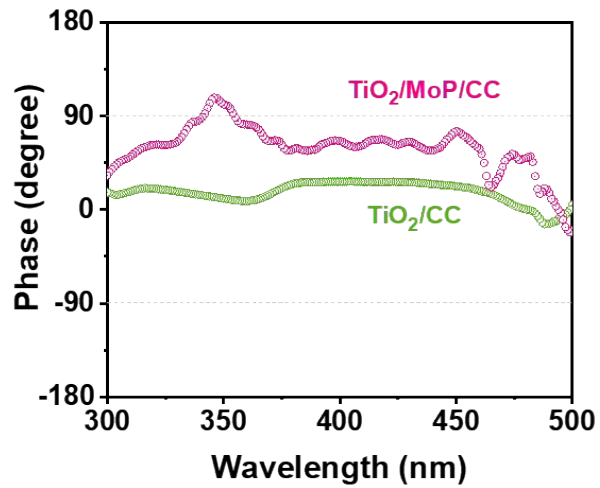

**Fig. S13** The phase spectra of TiO<sub>2</sub>/CC and TiO<sub>2</sub>/MoP/CC samples obtained from the SPV spectra.

Generally, the phase values in quadrants I and IV ( $0$  to  $\pm 90^\circ$ ) indicate the holes transfer to the surface, whereas the electrons move to the surface when the phase values locate in quadrant II and III ( $\pm 90$  to  $\pm 180^\circ$ ). As shown in Fig. S13, both phase values of TiO<sub>2</sub>/CC and TiO<sub>2</sub>/MoP/CC in quadrants I and IV region are observed.

### 3. Supplementary Tables

**Table S1.** The loading amount of MoP and TiO<sub>2</sub> in TiO<sub>2</sub>/MoP/CC-*x* (*x* = 0.6, 2.6, 3.0 and 3.6).

| Sample                       | m <sub>MoP</sub> (mg) | m <sub>TiO<sub>2</sub></sub> (mg) | m <sub>MoP</sub> /m <sub>TiO<sub>2</sub></sub> (wt%) |
|------------------------------|-----------------------|-----------------------------------|------------------------------------------------------|
| TiO <sub>2</sub> /MoP/CC-0.6 | 0.6                   | 12.8                              | 4.7                                                  |
| TiO <sub>2</sub> /MoP/CC-2.6 | 2.6                   | 12.8                              | 20.3                                                 |
| TiO <sub>2</sub> /MoP/CC-3.0 | 3.0                   | 12.8                              | 23.4                                                 |
| TiO <sub>2</sub> /MoP/CC-3.6 | 3.6                   | 12.8                              | 28.1                                                 |

**Table S2.** The specific resistance values of EIS plots of TiO<sub>2</sub>/CC and TiO<sub>2</sub>/MoP/CC in dark condition.

| <b>Sample</b>            | <b>R<sub>s</sub> (Ω)</b> | <b>R<sub>ct</sub> (Ω)</b> |
|--------------------------|--------------------------|---------------------------|
| TiO <sub>2</sub> /CC     | 12.0                     | 2.4                       |
| TiO <sub>2</sub> /MoP/CC | 11.3                     | 1.5                       |

#### 4. Supplemental references

- S1. L.-L. Zhang, H.-W. Zhang, B. Wang, X.-Y. Huang, Y. Ye, R. Lei, W.-H. Feng and P. Liu, A facile method for regulating the charge transfer route of WO<sub>3</sub>/CdS in high-efficiency hydrogen production, *Appl. Catal. B Environ.*, 2019, **244**, 529-535.
- S2. C. Xue, P. Zhang, G.-S. Shao and G.-D. Yang, Effective promotion of spacial charge separation in direct Z-scheme WO<sub>3</sub>/CdS/WS<sub>2</sub> tandem heterojunction with enhanced visible-light-driven photocatalytic H<sub>2</sub> evolution, *Chem. Eng. J.*, 2020, **398**, 125602.
